# Supplementary material for: Fine structure of the spermatozoon in three species of Cambaridae (Arthropoda: Crustacea: Decapoda) Cambarus robustus, Orconectes propinquus and Orconectes rusticus: a comparative biometrical study
Source: PeerJ. 2016 Aug 24;4:e2363. doi: 10.7717/peerj.2363 (PMC5012297; doi:10.7717/peerj.2363)
Supplement: Data S1 [file peerj-04-2363-s001.xls]

## Sheet: Sheet1
length	width	L:W Ratio	Species
4.61082	12.6761	0.36374	A.a
3.78686	11.8488	0.319598	A.a
4.09756	9.44417	0.433871	A.a
4.90411	11.4007	0.430159	A.a
5.77203	12.2403	0.471561	A.a
5.39327	12.7014	0.424622	A.a
4.24141	11.1273	0.38117	A.a
5.22123	11.5471	0.45217	A.a
4.86158	11.8984	0.408591	A.a
4.35827	12.1295	0.359313	A.a
4.17394	9.88012	0.422458	A.a
5.02628	11.1024	0.452719	A.a
4.41994	11.7784	0.375259	A.a
4.45389	11.3472	0.392509	A.a
4.52871	12.5893	0.359726	A.a
5.48091	11.7112	0.468007	A.a
4.3263	12.4443	0.347654	A.a
5.4594	11.569	0.471899	A.a
4.07336	10.604	0.384135	A.a
4.47664	11.3237	0.395334	A.a
4.9029	11.7519	0.417199	A.a
4.48031	10.9287	0.409958	A.a
5.60668	12.4381	0.450769	A.a
3.6785	10.5567	0.348452	A.a
4.33025	9.9268	0.436218	A.a
5.32828	11.721	0.454595	A.a
3.79889	10.2363	0.371118	A.a
4.88822	10.0657	0.485632	A.a
5.76353	11.2301	0.513222	A.a
5.03645	11.9444	0.42166	A.a
5.3694	11.2326	0.478017	A.a
5.51888	12.5494	0.439773	A.a
5.42495	14.6153	0.371184	A.a
5.10764	9.98329	0.511619	A.a
5.6906	12.3258	0.461682	A.a
5.23973	10.5854	0.494998	A.a
5.7705	11.5041	0.501601	A.a
4.66305	11.2673	0.413858	A.a
4.69684	11.7107	0.401073	A.a
5.47742	11.9248	0.459328	A.a
4.64695	12.1318	0.38304	A.a
5.05866	12.7396	0.397081	A.a
4.85714	11.6243	0.417844	A.a
4.51795	12.3931	0.364554	A.a
5.13701	11.2376	0.457127	A.a
5.21901	9.56228	0.545791	A.a
5.33891	13.0731	0.408389	A.a
5.32468	10.3416	0.514879	A.a
4.70589	11.2095	0.419811	A.a
5.43751	10.4753	0.519079	A.a
4.57504	12.4675	0.366957	A.a
5.1948	11.003	0.472126	A.a
4.95893	11.1666	0.444087	A.a
6.66384	11.5065	0.579138	A.a
5.73245	12.4487	0.460484	A.a
4.9259	10.618	0.463918	A.a
6.08552	12.1855	0.499407	A.a
4.9209	9.7716	0.503592	A.a
4.91734	10.3724	0.474079	A.a
5.29943	12.2967	0.430961	A.a
5.47212	13.1346	0.41662	A.a
5.84797	11.4816	0.509335	A.a
4.19734	9.51482	0.441137	A.a
4.78163	8.47892	0.563944	A.a
4.9932	11.6064	0.430209	A.a
5.18234	11.9236	0.434628	A.a
4.84385	11.4715	0.422251	A.a
4.66461	12.494	0.373347	A.a
4.345	11.9236	0.364402	A.a
4.16546	10.285	0.405004	A.a
4.37028	12.4852	0.350037	A.a
5.04152	12.3575	0.407973	A.a
4.51124	12.2454	0.368404	A.a
6.65383	13.7635	0.483442	A.a
4.83882	11.5223	0.419954	A.a
5.41499	13.6592	0.396436	A.a
5.7542	11.6126	0.495513	A.a
4.77388	12.9253	0.369344	A.a
4.70034	12.2691	0.383105	A.a
6.68322	12.7893	0.522565	A.a
4.99237	12.0849	0.413109	A.a
5.04161	11.4864	0.438919	A.a
5.58366	11.3461	0.49212	A.a
4.39216	12.1967	0.36011	A.a
5.7432	10.8212	0.530737	A.a
4.44702	9.77243	0.455057	A.a
5.04161	12.5412	0.402003	A.a
4.12121	12.9884	0.3173	A.a
5.73689	12.4987	0.459001	A.a
5.27642	12.3839	0.426071	A.a
5.00594	10.6984	0.467915	A.a
6.58988	12.346	0.533766	A.a
4.89223	13.0561	0.374709	A.a
4.80281	12.7711	0.37607	A.a
4.97117	12.0245	0.413422	A.a
5.07501	12.6084	0.402511	A.a
5.36903	12.1048	0.443544	A.a
4.88622	12.0775	0.404572	A.a
5.21353	11.8068	0.441569	A.a
4.42383	11.6389	0.38009	A.a
4.80281	11.1423	0.431044	A.a
4.03818	8.95101	0.451142	A.a
4.60014	12.201	0.37703	A.a
5.96041	11.6541	0.511442	A.a
4.95146	12.165	0.407024	A.a
5.34333	12.6296	0.423081	A.a
4.154	11.4839	0.361725	A.a
5.76593	10.016	0.575672	A.a
6.43458	11.1592	0.576616	A.a
5.60886	11.4733	0.488862	A.a
4.99232	11.8123	0.422637	A.a
6.01047	12.9396	0.464502	A.a
5.26811	12.5647	0.419279	A.a
7.25659	13.3381	0.544051	A.a
6.83775	12.993	0.526266	A.a
5.44909	10.1394	0.537419	A.a
4.60696	11.201	0.4113	A.a
5.83058	11.9758	0.486864	A.a
7.01598	12.9888	0.540157	A.a
5.78199	11.7789	0.490877	A.a
5.27818	11.6382	0.453522	A.a
5.57076	10.062	0.553646	A.a
6.74258	12.8004	0.526746	A.a
4.12299	9.67989	0.425934	A.a
6.35591	11.4872	0.553302	A.a
5.93808	12.0475	0.492887	A.a
5.25446	12.48	0.421029	A.a
6.06825	12.0539	0.503428	A.a
3.65089	7.77699	0.469448	Au.t
4.23333	7.72699	0.547863	Au.t
4.18579	9.05118	0.462458	Au.t
5.49493	9.32497	0.58927	Au.t
4.15498	8.12056	0.511661	Au.t
4.80605	7.41757	0.647927	Au.t
4.58836	8.85377	0.518238	Au.t
4.44413	9.34972	0.475322	Au.t
3.74416	8.75948	0.427441	Au.t
4.18215	8.13578	0.514044	Au.t
4.37314	8.96894	0.487587	Au.t
4.01337	7.73449	0.518893	Au.t
3.93687	8.95563	0.439597	Au.t
4.14493	9.35504	0.44307	Au.t
3.71603	8.38229	0.44332	Au.t
3.74844	8.57127	0.437326	Au.t
3.78785	8.3849	0.451747	Au.t
4.14009	9.31146	0.444623	Au.t
3.62825	7.4505	0.48698	Au.t
5.53477	9.45644	0.585291	Au.t
4.54753	9.58674	0.474357	Au.t
4.77607	9.56803	0.499169	Au.t
3.60696	9.64054	0.374145	Au.t
4.62084	7.92081	0.58338	Au.t
4.25526	8.76506	0.48548	Au.t
4.47577	9.0874	0.492525	Au.t
4.47472	9.94861	0.449783	Au.t
4.97465	8.82212	0.563884	Au.t
3.9134	7.61038	0.514219	Au.t
3.83354	8.37037	0.457989	Au.t
4.29268	9.30263	0.461448	Au.t
4.75678	9.03282	0.526611	Au.t
4.54785	8.85873	0.513375	Au.t
4.20169	8.86153	0.474149	Au.t
3.78634	6.63299	0.570834	Au.t
3.90727	9.28165	0.420967	Au.t
4.5534	8.43971	0.53952	Au.t
3.55034	8.34914	0.425234	Au.t
3.30125	7.81081	0.422651	Au.t
4.32454	7.86448	0.549882	Au.t
4.42628	8.24542	0.536817	Au.t
3.87995	6.91038	0.561467	Au.t
4.74429	8.01328	0.592054	Au.t
4.83932	9.24778	0.523295	Au.t
3.67403	8.27664	0.443904	Au.t
4.25272	7.56047	0.562494	Au.t
3.57674	7.53676	0.474573	Au.t
4.44036	8.24419	0.538605	Au.t
4.09874	8.22824	0.498131	Au.t
4.04868	7.65873	0.528636	Au.t
4.16811	7.07362	0.589247	Au.t
4.39714	7.70984	0.570328	Au.t
4.15305	7.5512	0.549985	Au.t
4.25552	7.51905	0.565965	Au.t
3.23092	7.06211	0.4575	Au.t
3.92305	5.952	0.659115	Au.t
4.36495	7.71587	0.565711	Au.t
3.08467	6.82078	0.452246	Au.t
4.14496	7.50476	0.552311	Au.t
4.21274	7.26495	0.579872	Au.t
3.94295	7.47132	0.527745	Au.t
3.97621	6.98562	0.569199	Au.t
4.05545	7.39826	0.548163	Au.t
3.96527	7.43512	0.533316	Au.t
3.9114	6.9517	0.562654	Au.t
3.63285	6.01078	0.604389	Au.t
4.19961	9.00581	0.466322	Au.t
4.16776	8.08188	0.515692	Au.t
4.33336	7.00606	0.618516	Au.t
3.59083	6.83911	0.525043	Au.t
3.80891	7.43985	0.51196	Au.t
3.94551	7.39269	0.533705	Au.t
3.63915	7.7092	0.472053	Au.t
3.9767	7.36974	0.539599	Au.t
3.90643	6.89225	0.566786	Au.t
4.05627	8.26181	0.490967	Au.t
3.52253	6.68878	0.526632	Au.t
4.34828	8.01523	0.542502	Au.t
4.00001	8.09965	0.49385	Au.t
3.98493	6.47031	0.61588	Au.t
4.45627	6.62625	0.672517	Au.t
4.54778	7.58756	0.599373	Au.t
4.1654	8.68243	0.479751	Au.t
4.20195	6.9202	0.607201	Au.t
3.7895	7.91393	0.47884	Au.t
3.9694	6.7078	0.591758	Au.t
5.75574	11.691	0.492324	P.l
4.54197	9.35668	0.485425	P.l
4.78172	11.1821	0.427624	P.l
6.69543	9.26347	0.722778	P.l
6.74383	10.862	0.620867	P.l
4.91376	8.49554	0.578393	P.l
5.02017	10.5674	0.47506	P.l
4.67877	11.2458	0.416047	P.l
4.37868	12.0979	0.361936	P.l
4.08346	8.49471	0.480706	P.l
3.95369	7.82266	0.505415	P.l
3.65142	7.47482	0.488496	P.l
4.64611	8.18356	0.567737	P.l
4.34396	9.15155	0.474669	P.l
4.4893	8.9113	0.503776	P.l
3.7337	7.18884	0.519375	P.l
4.28347	8.26328	0.518374	P.l
4.66275	8.02311	0.581165	P.l
4.27474	8.93123	0.478628	P.l
3.82106	7.99913	0.477684	P.l
4.71495	8.58864	0.548975	P.l
3.96774	8.1435	0.487228	P.l
4.5049	8.95154	0.503254	P.l
4.04052	8.64296	0.467492	P.l
5.012	8.51274	0.588765	P.l
4.29824	9.65666	0.445107	P.l
4.08314	8.25636	0.494545	P.l
4.33354	7.74313	0.559663	P.l
4.29363	9.32595	0.460396	P.l
4.09976	7.77961	0.526988	P.l
3.89288	8.76167	0.444308	P.l
4.37591	8.10232	0.540081	P.l
5.04823	7.80821	0.646529	P.l
5.38537	9.56446	0.56306	P.l
4.24432	7.68165	0.552527	P.l
4.34904	10.2821	0.422973	P.l
5.83812	9.53153	0.612506	P.l
3.41858	8.91489	0.383468	P.l
4.17463	9.62205	0.433861	P.l
4.17463	9.62205	0.433861	P.l
4.06275	10.5054	0.38673	P.l
4.9733	9.84159	0.505335	P.l
4.74924	10.4718	0.453525	P.l
3.64738	9.44508	0.386167	P.l
4.46872	10.0008	0.446836	P.l
4.18212	10.2671	0.407333	P.l
4.43272	8.99856	0.492603	P.l
3.77516	9.9059	0.381102	P.l
3.41633	10.6872	0.319665	P.l
4.89391	11.3202	0.432316	P.l
5.20382	11.1361	0.467294	P.l
4.21508	9.59371	0.439359	P.l
4.75144	11.5793	0.410341	P.l
3.45008	8.08864	0.426534	P.l
1.41974	2.22114	0.639195	P.c
1.49395	2.68589	0.556223	P.c
1.63452	2.41066	0.67804	P.c
1.60076	2.7134	0.589947	P.c
1.42067	2.41603	0.588017	P.c
1.28139	2.55675	0.501179	P.c
1.41777	2.32973	0.608554	P.c
1.2769	2.28738	0.558238	P.c
1.28923	2.57155	0.501345	P.c
1.38105	2.26815	0.608889	P.c
1.60015	2.68279	0.596451	P.c
1.54926	2.5988	0.596146	P.c
1.3803	2.55824	0.539551	P.c
1.27429	2.5447	0.500761	P.c
1.44605	2.50337	0.577641	P.c
1.54766	2.63731	0.586831	P.c
1.56158	2.65205	0.58882	P.c
1.64423	2.35352	0.698624	P.c
1.39679	2.26761	0.615972	P.c
1.26714	2.63978	0.480016	P.c
1.26775	2.32957	0.544198	P.c
1.3801	2.42886	0.568209	P.c
1.29761	2.45032	0.52957	P.c
1.88559	2.67339	0.705318	P.c
1.36061	2.52329	0.53922	P.c
1.77011	2.38653	0.741709	P.c
1.5281	2.53371	0.603106	P.c
1.50376	2.58479	0.581774	P.c
1.67261	2.21403	0.755459	P.c
1.56905	2.59313	0.60508	P.c
1.69474	2.71284	0.624709	P.c
1.71092	2.71351	0.630521	P.c
1.25984	2.18676	0.576119	P.c
1.52902	2.30003	0.664782	P.c
1.20863	2.07425	0.582686	P.c
1.48707	2.82693	0.526039	P.c
1.37605	2.72843	0.504339	P.c
1.67727	2.52829	0.663399	P.c
1.65625	2.7115	0.610824	P.c
1.37008	2.70383	0.506717	P.c
1.23253	2.10346	0.585953	P.c
1.46958	2.23551	0.657378	P.c
1.86865	2.66946	0.700011	P.c
1.34515	2.49007	0.540206	P.c
1.51532	2.50705	0.604421	P.c
1.44654	2.58851	0.55883	P.c
1.74073	2.33969	0.743998	P.c
1.37423	2.4423	0.56268	P.c
1.16537	2.36514	0.492727	P.c
1.21027	2.00169	0.604625	P.c
1.19365	2.01951	0.591059	P.c
1.4702	2.24343	0.655335	P.c
1.42903	2.56916	0.556223	P.c
1.47657	2.61234	0.565228	P.c
1.62335	2.49561	0.650479	P.c
1.44411	2.3745	0.608174	P.c
1.3568	2.23077	0.608219	P.c
1.42192	2.322	0.612367	P.c
1.26875	2.70702	0.468687	P.c
1.57656	2.41793	0.652027	P.c
1.44393	2.4216	0.596274	P.c
1.25414	2.57568	0.486916	P.c
1.49908	2.32627	0.644414	P.c
1.61658	2.08257	0.776243	P.c
1.48237	2.50953	0.590698	P.c
1.50896	2.7178	0.555214	P.c
1.45489	2.2582	0.644273	P.c
1.78096	2.46392	0.722817	P.c
1.46136	2.78228	0.525238	P.c
1.7902	2.30583	0.776383	P.c
1.55964	2.37529	0.65661	P.c
1.89569	2.35887	0.803644	P.c
1.45041	2.43961	0.594527	P.c
1.25858	2.38303	0.528141	P.c
1.58729	2.73955	0.579398	P.c
1.5251	2.71963	0.560776	P.c
1.3471	2.38781	0.56416	P.c
1.11278	2.34608	0.474314	P.c
1.43815	2.43959	0.589504	P.c
1.58703	2.41904	0.656061	P.c
1.27879	2.35789	0.542343	P.c
1.56267	2.41768	0.646351	P.c
1.40225	2.308	0.607563	P.c
1.40186	2.25524	0.621602	P.c
1.6055	2.19777	0.730513	P.c
1.35122	2.41886	0.558618	P.c
1.39498	2.51231	0.555259	P.c
1.41166	2.38811	0.591123	P.c
1.20502	2.29273	0.525582	P.c
1.60241	2.83462	0.565299	P.c
1.45692	2.35898	0.617608	P.c
1.56397	2.85124	0.54852	P.c
1.52982	2.72228	0.561962	P.c
1.44673	2.6515	0.545626	P.c
1.85644	2.58282	0.718766	P.c
1.50463	2.98341	0.504332	P.c
1.348	2.65256	0.508189	P.c
1.41458	2.15681	0.655864	P.c
1.42143	2.7146	0.523625	P.c
1.59229	2.02002	0.788257	P.c
1.42691	2.42395	0.588671	P.c
1.49168	2.5552	0.58378	P.c
1.35091	2.30947	0.584943	P.c
1.25405	2.64056	0.474919	P.c
1.32936	2.34668	0.566484	P.c
2.31233	1.41825	1.63041	P.c
1.2833	2.32288	0.552459	P.c
1.28794	2.33435	0.551735	P.c
1.27998	2.10811	0.607172	P.c
1.43895	2.44846	0.587695	P.c
1.58393	2.28133	0.694302	P.c
1.40087	2.23511	0.626755	P.c
1.34754	2.37726	0.566847	P.c
1.28887	2.4123	0.534293	P.c
1.59458	2.39058	0.667027	P.c
1.35605	4.26664	0.317825	O.l
1.73206	3.95705	0.437715	O.l
1.45025	4.40424	0.329285	O.l
1.65338	4.44537	0.371934	O.l
1.71462	4.6733	0.366897	O.l
1.85747	4.98986	0.372249	O.l
1.46339	4.23323	0.345691	O.l
1.87533	3.96148	0.473391	O.l
1.68782	4.95806	0.340418	O.l
1.39534	5.16955	0.269915	O.l
1.66643	5.0777	0.328186	O.l
1.48226	5.34437	0.27735	O.l
1.67978	5.25069	0.319915	O.l
2.00552	5.08216	0.394619	O.l
1.81666	4.80769	0.377866	O.l
1.6413	4.7525	0.345356	O.l
1.68831	4.99279	0.338149	O.l
1.75398	5.5876	0.313906	O.l
2.70048	5.95025	0.453843	O.l
1.86673	5.11511	0.364945	O.l
2.23803	5.21676	0.429009	O.l
1.7381	5.19526	0.334555	O.l
1.92038	4.30309	0.44628	O.l
1.49858	5.36803	0.279167	O.l
1.91886	4.57941	0.419019	O.l
1.7274	5.27543	0.327442	O.l
1.33561	5.17577	0.258051	O.l
1.57225	5.27593	0.298004	O.l
1.37664	4.51338	0.305013	O.l
1.82754	4.05785	0.450371	O.l
1.6038	3.72465	0.43059	O.l
1.56849	4.46441	0.351332	O.l
1.80263	4.644	0.388163	O.l
1.45881	4.35871	0.334688	O.l
1.80116	5.67049	0.317638	O.l
1.83717	5.06881	0.362446	O.l
2.27935	5.41867	0.420648	O.l
1.79585	5.37604	0.334048	O.l
1.77344	3.58112	0.49522	O.l
1.57099	5.05976	0.310487	O.l
1.82089	5.10483	0.3567	O.l
1.65095	4.46632	0.369645	O.l
2.14752	4.34468	0.494288	O.l
1.549	4.26999	0.362765	O.l
1.77799	5.69711	0.312086	O.l
1.71951	4.46445	0.385155	O.l
1.77049	4.0901	0.432873	O.l
1.5107	3.83037	0.3944	O.l
1.91192	4.73295	0.403958	O.l
1.70178	4.92928	0.345239	O.l
1.5583	4.72891	0.329527	O.l
1.82104	5.14576	0.353891	O.l
1.70921	4.75022	0.359816	O.l
1.43346	5.02574	0.285225	O.l
1.56053	4.35163	0.358608	O.l
1.60607	4.45669	0.360374	O.l
1.5981	3.93482	0.406143	O.l
1.51361	4.78317	0.316446	O.l
1.52051	4.18503	0.363321	O.l
1.76809	5.25205	0.336648	O.l
1.57296	3.79401	0.414589	O.l
1.60106	5.02816	0.318418	O.l
1.54722	3.89048	0.397693	O.l
1.51883	3.99318	0.380358	O.l
1.5499	3.92625	0.394752	O.l
1.43387	4.23079	0.338912	O.l
1.90671	5.04473	0.37796	O.l
1.8462	4.5178	0.408651	O.l
1.92521	5.07353	0.379461	O.l
1.87766	4.39814	0.426921	O.l
2.04011	4.97991	0.409668	O.l
1.73899	4.2601	0.408203	O.l
1.80442	4.89249	0.368814	O.l
2.1883	3.91915	0.55836	O.l
1.76219	4.34815	0.405275	O.l
1.55374	4.85329	0.320141	O.l
1.59067	4.03658	0.394064	O.l
1.80666	4.40397	0.410235	O.l
1.47078	4.13659	0.355553	O.l
1.49296	4.08922	0.365097	O.l
1.43009	5.2566	0.272056	O.l
1.50902	4.50232	0.335164	O.l
1.42822	4.33132	0.329742	O.l
1.40053	3.96095	0.353584	O.l
1.72672	4.25106	0.406185	O.l
1.4888	4.62584	0.321845	O.l
1.69225	4.78038	0.353998	O.l
1.39389	4.9119	0.283778	O.l
1.33825	5.42831	0.246532	O.l
1.69702	4.54718	0.373204	O.l
1.54018	4.87286	0.316074	O.l
2.15909	5.05297	0.427291	O.l
1.91438	4.32639	0.442488	O.l
1.47247	5.3524	0.275105	O.l
1.53575	4.77602	0.321555	O.l
1.55688	4.19887	0.370786	O.l
2.15767	5.32266	0.405374	O.l
2.00382	5.27181	0.380101	O.l
1.70933	5.3575	0.319053	O.l
1.58304	4.55265	0.347718	O.l
2.20101	5.29781	0.415456	O.l
1.79612	5.16605	0.347679	O.l
1.63763	5.20008	0.314925	O.l
1.57974	4.62389	0.341648	O.l
1.9247	5.63059	0.341828	O.l
1.43145	4.46131	0.320858	O.l
1.39776	4.62155	0.302443	O.l
1.65969	5.05912	0.32806	O.l
1.91394	4.54809	0.420822	O.l
1.53161	4.44542	0.344536	O.l
1.55908	5.21826	0.298774	O.l
1.58996	5.70434	0.278729	O.l
1.61332	4.16601	0.387258	O.l
1.83324	4.98996	0.367386	O.l
1.57765	5.15712	0.305917	O.l
1.62638	5.02345	0.323757	O.l
1.8607	5.61644	0.331294	O.l
1.61766	5.67711	0.284944	O.l
1.85038	4.94866	0.373915	O.l
1.96585	4.86165	0.404358	O.l
1.79757	4.94151	0.363769	O.l
1.75454	5.03009	0.348809	O.l
1.81759	4.33457	0.419324	O.l
1.60032	4.45262	0.359411	O.l
1.64274	5.18654	0.316732	O.l
1.78774	5.01374	0.356568	O.l
1.80861	5.04671	0.358375	O.l
1.55676	5.12467	0.303778	O.l
1.93247	4.61992	0.41829	O.l
1.78035	4.64497	0.383286	O.l
1.55293	5.01188	0.30985	O.l
2.02654	4.82281	0.4202	O.l
1.78043	5.30373	0.335694	O.l
1.59588	4.60866	0.346279	O.l
1.99412	4.79654	0.415741	O.l
1.49801	5.03763	0.297363	O.l
1.69573	5.62223	0.301613	O.l
1.6947	5.76829	0.293795	O.l
1.73947	4.32839	0.401874	O.l
5.04003	9.20511	0.547525	A.l
4.92003	7.96119	0.618001	A.l
5.53556	9.15807	0.604446	A.l
5.05204	7.88525	0.640695	A.l
5.63931	9.91248	0.56891	A.l
5.43305	8.26144	0.65764	A.l
6.4413	8.60921	0.748187	A.l
5.21435	8.36998	0.622982	A.l
4.97767	6.74234	0.73827	A.l
4.67478	9.53062	0.490501	A.l
3.80374	8.56931	0.443879	A.l
5.12742	7.81452	0.656141	A.l
3.87047	7.5045	0.515753	A.l
4.73991	7.55915	0.627043	A.l
4.82424	8.99528	0.536308	A.l
4.53878	8.28837	0.547608	A.l
6.49668	9.14748	0.710216	A.l
6.0794	8.67748	0.700595	A.l
5.08712	5.99738	0.848224	A.l
4.29993	7.58625	0.566806	A.l
4.83317	7.40512	0.652679	A.l
5.03192	8.09421	0.621669	A.l
3.90154	8.24006	0.473485	A.l
4.37497	8.16549	0.535787	A.l
4.51847	8.05502	0.560952	A.l
4.31898	7.88579	0.547691	A.l
4.08885	9.08777	0.449929	A.l
3.61813	6.69301	0.540584	A.l
4.18891	8.12114	0.515803	A.l
4.78973	8.69878	0.550621	A.l
5.15044	8.74423	0.589011	A.l
3.74223	8.48131	0.441233	A.l
4.1085	8.41081	0.488478	A.l
4.48559	7.41197	0.605183	A.l
4.21102	8.04181	0.523641	A.l
4.32059	8.80846	0.490504	A.l
3.89259	7.94589	0.489887	A.l
4.34706	8.86735	0.490233	A.l
4.76864	7.71721	0.617922	A.l
4.37427	8.45107	0.517599	A.l
4.3329	8.00237	0.541452	A.l
4.5546	8.63636	0.527376	A.l
4.21483	8.66206	0.486585	A.l
4.62892	7.43193	0.622842	A.l
3.86136	7.40131	0.521714	A.l
5.79013	8.46224	0.684231	A.l
4.26724	9.72085	0.438978	A.l
4.27624	9.16352	0.466659	A.l
4.12814	8.48549	0.486494	A.l
4.62652	8.51491	0.543343	A.l
4.81517	8.44867	0.569932	A.l
5.3299	7.39867	0.720387	A.l
4.58914	9.32185	0.492299	A.l
4.65058	9.01289	0.515992	A.l
3.65311	7.77246	0.470007	A.l
4.98069	9.07274	0.548974	A.l
4.40345	8.11756	0.54246	A.l
3.99374	8.21478	0.486165	A.l
4.77086	8.11012	0.58826	A.l
3.68667	8.26911	0.445836	A.l
4.66331	9.07012	0.51414	A.l
3.32919	8.2185	0.405084	A.l
4.57114	8.9901	0.508464	A.l
4.54713	7.39605	0.614805	A.l
3.91801	8.22766	0.4762	A.l
4.02324	7.80578	0.515418	A.l
5.1952	7.92776	0.655318	A.l
3.11699	6.23575	0.499858	A.l
4.27519	8.54494	0.500318	A.l
4.29629	8.8889	0.483332	A.l
4.34393	8.11371	0.535382	A.l
4.78447	9.01014	0.531009	A.l
4.73573	7.79573	0.607478	A.l
4.45855	9.03177	0.493652	A.l
3.99654	7.7416	0.516243	A.l
3.88713	7.95324	0.488749	A.l
4.36183	8.46642	0.515192	A.l
5.29361	11.0387	0.479553	A.l
5.09309	9.76282	0.521682	A.l
4.89937	8.66759	0.565252	A.l
4.42886	8.09776	0.546924	A.l
5.23402	10.7634	0.486281	A.l
5.68232	8.83628	0.643068	A.l
4.35029	8.25284	0.527127	A.l
3.91067	7.22118	0.541556	A.l
3.7512	7.52448	0.498533	A.l
3.70113	7.07638	0.523025	A.l
4.14634	8.26005	0.501975	A.l
4.27407	7.56491	0.564987	A.l
3.87337	8.61704	0.449501	A.l
4.35139	7.64021	0.569538	A.l
3.74891	9.25149	0.405223	A.l
4.15434	7.24944	0.573057	A.l
4.14929	8.20165	0.505909	A.l
3.22838	5.5248	0.584342	A.l
3.30799	6.34903	0.521023	A.l
4.63378	6.8627	0.675213	A.l
3.6161	6.90586	0.523627	A.l
1.3834	1.83399	0.75431	C.d
1.11918	1.61168	0.694417	C.d
0.812648	2.10119	0.386757	C.d
1.0791	1.73237	0.622907	C.d
0.88037	1.93192	0.455696	C.d
1.11401	1.71576	0.649285	C.d
0.963648	1.43159	0.67313	C.d
0.746032	1.79266	0.416159	C.d
0.867987	1.74851	0.496414	C.d
1.14625	1.72727	0.663616	C.d
0.918513	2.08544	0.44044	C.d
0.916172	1.92871	0.475017	C.d
1.15034	1.97405	0.582734	C.d
1.07334	1.49851	0.71627	C.d
1.1648	1.7739	0.656633	C.d
1.15245	1.87059	0.61609	C.d
0.960412	2.07284	0.463331	C.d
1.07504	1.65245	0.650574	C.d
1.11234	2.13212	0.521707	C.d
1.38821	2.03853	0.680985	C.d
0.878505	1.5845	0.554436	C.d
1.10046	1.89359	0.581152	C.d
0.895916	1.43742	0.623281	C.d
0.803701	1.39855	0.574669	C.d
1.31551	2.14257	0.613986	C.d
1.17184	1.74422	0.671845	C.d
0.85237	1.5676	0.543742	C.d
0.891614	1.72864	0.515789	C.d
1.36126	1.89565	0.718098	C.d
0.767315	1.48716	0.51596	C.d
1.12802	2.06965	0.545027	C.d
0.986772	1.58598	0.622185	C.d
0.958795	1.62193	0.591145	C.d
0.777043	1.47393	0.527191	C.d
0.960474	1.84914	0.519416	C.d
1.10069	2.20776	0.498554	C.d
0.996493	2.20733	0.451448	C.d
1.16143	2.29293	0.506527	C.d
0.964342	2.19414	0.439509	C.d
0.976494	1.78501	0.547051	C.d
1.1369	1.94709	0.583899	C.d
0.889109	1.52343	0.583622	C.d
1.03503	2.02776	0.51043	C.d
0.725452	1.1544	0.628422	C.d
1.23092	2.14879	0.572842	C.d
0.884158	1.57723	0.560578	C.d
0.939542	1.73693	0.540922	C.d
0.935889	1.93787	0.482947	C.d
1.07336	2.10839	0.509091	C.d
0.830968	1.44645	0.574487	C.d
0.738472	1.12582	0.655939	C.d
0.909881	1.72806	0.526532	C.d
0.996047	2.1278	0.468111	C.d
0.911765	1.95294	0.466867	C.d
0.847082	1.87315	0.452223	C.d
1.13927	2.33135	0.488675	C.d
1.18592	1.83244	0.647182	C.d
1.1013	1.94935	0.564961	C.d
0.901935	1.93129	0.467012	C.d
0.909571	1.6132	0.56383	C.d
0.953696	1.68482	0.566051	C.d
0.943508	1.73538	0.543689	C.d
0.857426	1.47129	0.582773	C.d
1.26561	1.86224	0.679617	C.d
0.969697	1.96311	0.49396	C.d
1.16486	1.70582	0.68287	C.d
0.992571	1.89212	0.524582	C.d
0.856173	1.85229	0.462223	C.d
0.961568	1.81988	0.52837	C.d
1.08251	2.0264	0.534202	C.d
0.86838	1.79712	0.483207	C.d
0.998441	1.72097	0.580163	C.d
1.11566	1.55849	0.715861	C.d
0.992063	1.79497	0.55269	C.d
1.02277	2.08812	0.489806	C.d
1.28487	2.21958	0.578877	C.d
0.869964	1.39204	0.624957	C.d
1.15331	1.7181	0.671272	C.d
0.854318	1.50297	0.568421	C.d
0.888008	1.5441	0.575096	C.d
0.906008	1.80846	0.500982	C.d
1.0463	1.71958	0.608462	C.d
1.07444	2.11989	0.506837	C.d
1.01677	1.89509	0.53653	C.d
0.884292	1.26826	0.697248	C.d
1.04825	1.81097	0.578832	C.d
1.09769	1.56172	0.702874	C.d
0.906008	1.80846	0.500982	C.d
1.0463	1.71958	0.608462	C.d
1.07444	2.11989	0.506837	C.d
1.01677	1.89509	0.53653	C.d
0.884292	1.26826	0.697248	C.d
1.04825	1.81097	0.578832	C.d
1.09769	1.56172	0.702874	C.d
0.989404	2.24636	0.440448	C.d
1.22603	1.84645	0.663993	C.d
0.797627	1.48319	0.537778	C.d
1.01674	1.90116	0.534801	C.d
1.21246	2.08194	0.582371	C.d
0.835644	1.39703	0.598157	C.d
0.899802	1.34325	0.669867	C.d
1.11566	1.55849	0.715861	C.d
1.16721	2.08033	0.561072	C.d
1.25	2.05423	0.6085	C.d
0.731707	1.29334	0.565749	C.d
1.17089	1.78414	0.656279	C.d
1.11276	1.6093	0.691457	C.d
1.18041	1.79755	0.656676	C.d
0.895188	1.81279	0.493818	C.d
1.23555	2.54505	0.485472	C.d
1.09163	2.01978	0.54047	C.d
1.3125	2.43829	0.538287	C.q
1.24131	2.05405	0.604323	C.q
1.5445	2.24324	0.68851	C.q
1.1251	2.07522	0.542159	C.q
1.7256	2.40193	0.718423	C.q
1.1249	2.54531	0.44195	C.q
1.34096	3.16762	0.423335	C.q
1.16503	2.06046	0.565424	C.q
1.03626	2.29202	0.452114	C.q
1.33333	2.5372	0.525514	C.q
1.01089	1.57588	0.641481	C.q
1.66225	2.48212	0.669691	C.q
1.52541	2.61584	0.583144	C.q
1.17213	2.22131	0.527675	C.q
1.04327	2.32163	0.449367	C.q
1.1162	2.67921	0.416616	C.q
1.21626	2.40163	0.506432	C.q
0.941368	2.057	0.457641	C.q
0.978247	2.2795	0.42915	C.q
1.1302	2.2419	0.504127	C.q
1.58694	2.59755	0.610937	C.q
1.25244	2.38436	0.525273	C.q
1.54953	2.15016	0.72066	C.q
1.16367	2.49427	0.466535	C.q
1.73386	2.46971	0.702051	C.q
1.56471	2.575	0.607653	C.q
1.66453	3.26825	0.509305	C.q
0.974259	2.29797	0.423965	C.q
1.07984	2.39763	0.450379	C.q
1.24704	2.31728	0.538147	C.q
1.40505	2.42706	0.578912	C.q
1.66997	3.14455	0.531066	C.q
1.30288	2.49156	0.522917	C.q
1.2082	1.69663	0.712115	C.q
1.88201	2.56867	0.732681	C.q
1.31287	2.10561	0.623511	C.q
1.48665	2.68249	0.554204	C.q
1.32178	2.3198	0.569782	C.q
1.2319	2.38894	0.515667	C.q
1.71787	2.54106	0.676046	C.q
1.24389	2.50892	0.495785	C.q
1.37259	2.33012	0.589064	C.q
1.34587	2.25677	0.596373	C.q
1.47833	2.41864	0.611224	C.q
1.58261	2.55072	0.620455	C.q
1.20463	2.43436	0.494845	C.q
1.50829	2.25651	0.668416	C.q
1.60495	2.50891	0.6397	C.q
1.56172	2.36172	0.661263	C.q
0.869967	2.02904	0.428757	C.q
1.1564	2.25	0.513954	C.q
1.17959	2.51661	0.468721	C.q
1.29435	2.47968	0.521982	C.q
1.61959	2.29061	0.707056	C.q
1.41779	2.68472	0.528098	C.q
1.00117	2.25019	0.444925	C.q
1.15833	2.0902	0.554174	C.q
1.24779	2.34004	0.533235	C.q
1.275	2.02402	0.629935	C.q
1.23794	2.44415	0.50649	C.q
1.94052	2.76735	0.701218	C.q
1.10951	2.48799	0.445946	C.q
1.36996	2.62292	0.522303	C.q
1.61569	2.63873	0.612298	C.q
1.20172	2.28571	0.525752	C.q
1.15637	2.16275	0.534678	C.q
1.25335	2.2131	0.566334	C.q
1.15741	2.24074	0.516529	C.q
1.54515	2.84377	0.543347	C.q
1.55441	2.78235	0.558668	C.q
1.09584	2.17052	0.504872	C.q
1.0239	2.14373	0.477625	C.q
1.08767	2.1648	0.502436	C.q
1.05355	2.14194	0.491867	C.q
1.04092	2.25413	0.461786	C.q
1.10979	2.28175	0.486377	C.q
1.41972	2.13203	0.665902	C.q
1.33307	2.55722	0.521296	C.q
0.94902	2.39412	0.396396	C.q
1.29421	2.38631	0.54235	C.q
1.08347	2.33061	0.464888	C.q
1.13655	2.04252	0.556445	C.q
1.1631	2.17973	0.5336	C.q
1.3969	2.53301	0.55148	C.q
1.35342	2.04072	0.663208	C.q
1.44253	2.18959	0.658816	C.q
1.007	1.76654	0.570044	C.q
1.48467	2.364	0.628033	C.q
1.1802	2.14785	0.549478	C.q
1.51404	2.71636	0.557377	C.q
1.51347	2.36082	0.641079	C.q
1.70878	4.45323	0.383716	O.r
1.51316	4.88421	0.309806	O.r
1.74655	3.92383	0.445114	O.r
1.61711	4.27763	0.378038	O.r
1.40711	3.56522	0.394678	O.r
1.98818	4.08404	0.486817	O.r
2.42602	3.9626	0.612228	O.r
1.79842	4.15415	0.432921	O.r
2.00789	4.17105	0.481388	O.r
1.37236	4	0.343089	O.r
1.86667	4.19024	0.445479	O.r
1.47105	3.92105	0.375168	O.r
1.80858	4.16106	0.434645	O.r
1.85424	4.11162	0.450974	O.r
1.90344	3.69444	0.515217	O.r
1.51731	4.32308	0.350979	O.r
2.0065	3.99512	0.502239	O.r
2.26316	4.26579	0.530537	O.r
1.72632	4.39474	0.392814	O.r
1.46906	4.2101	0.348936	O.r
1.59396	4.43364	0.359514	O.r
1.67895	3.31053	0.507154	O.r
1.44005	3.86693	0.372402	O.r
1.56785	4.16469	0.376463	O.r
0.999343	3.85292	0.259373	O.r
2.32148	4.18314	0.554961	O.r
1.46711	3.94474	0.371915	O.r
2.32411	3.7747	0.615707	O.r
2.08696	4.66403	0.447458	O.r
1.69868	3.56579	0.476384	O.r
1.72237	3.78684	0.45483	O.r
1.67895	3.75526	0.447092	O.r
1.59684	4.16469	0.383423	O.r
2.30789	4.53553	0.508848	O.r
1.5325	3.90151	0.392797	O.r
1.60738	3.99209	0.40264	O.r
1.76278	4.14851	0.424919	O.r
1.62541	3.90879	0.415833	O.r
1.55537	4.37459	0.355547	O.r
1.86649	4.03569	0.462496	O.r
1.69829	3.88011	0.437691	O.r
1.37776	4.04811	0.340347	O.r
1.51496	4.70394	0.322062	O.r
2.11024	4.05276	0.520692	O.r
1.40315	3.75669	0.373507	O.r
1.34069	3.2571	0.411622	O.r
1.89431	4.06829	0.465627	O.r
1.87551	4.90865	0.382082	O.r
1.75451	4.58118	0.382982	O.r
1.59551	3.68936	0.432461	O.r
1.31788	3.38411	0.389432	O.r
1.41138	4.04497	0.348921	O.r
1.99518	3.82651	0.521411	O.r
1.62169	4.20241	0.385894	O.r
1.60717	4.1467	0.387579	O.r
1.66041	4.94694	0.335644	O.r
2.27106	5.17135	0.439161	O.r
3.25145	4.99037	0.651544	O.r
2.14836	5.07707	0.42315	O.r
3.00481	4.45673	0.674218	O.r
1.42308	5.62981	0.252775	O.r
2.19231	5.31731	0.412297	O.r
1.75962	4.71635	0.373089	O.r
1.86538	4.44712	0.419459	O.r
2.0613	5.00766	0.41163	O.r
1.94253	4.55172	0.426768	O.r
1.76245	4.65517	0.378601	O.r
1.78927	4.4023	0.40644	O.r
1.61399	4.73341	0.340979	O.r
1.68249	4.31751	0.389689	O.r
1.67213	5.38862	0.310308	O.r
2.03664	4.64995	0.437993	O.r
1.52443	4.82085	0.316216	O.r
1.58366	5.04743	0.313756	O.r
1.36627	4.70361	0.290471	O.r
1.51084	4.61687	0.327244	O.r
1.59518	4.44337	0.359002	O.r
1.96785	4.38585	0.44868	O.r
1.78778	4.39871	0.406433	O.r
1.56913	4.19936	0.37366	O.r
1.33119	4.13505	0.321928	O.r
1.38907	3.48553	0.398524	O.r
1.80064	4.17363	0.431433	O.r
1.57556	3.7492	0.42024	O.r
1.33119	5.0418	0.264031	O.r
1.78778	4.25723	0.41994	O.r
1.85256	5.30128	0.349456	O.r
2.00641	4.86538	0.412385	O.r
1.90385	4.55769	0.417722	O.r
1.64103	4.04487	0.405705	O.r
1.54487	4.73718	0.326116	O.r
2.16026	3.25641	0.663386	O.r
2.62179	4.52564	0.57932	O.r
2.01342	4.7651	0.422535	O.r
2.35858	3.84947	0.612702	O.r
1.27996	4.44391	0.288026	O.r
1.60115	5.20614	0.307551	O.r
1.70182	4.76989	0.356784	O.r
2.75168	4.56855	0.602308	O.r
1.38063	4.67881	0.295082	O.r
1.74976	4.82263	0.362823	O.r
1.40865	4.5625	0.308746	O.r
1.67788	4.5	0.372863	O.r
1.47596	3.99519	0.369434	O.r
1.4375	4.71635	0.304791	O.r
1.5625	3.98558	0.392039	O.r
1.64904	4.39423	0.375274	O.r
1.53846	4.63942	0.331606	O.r
1.31731	4.12981	0.318976	O.r
1.42788	4.63942	0.307772	O.r
1.60096	4.09135	0.391304	O.r
1.56731	4.20192	0.372998	O.r
1.70673	4.32692	0.394444	O.r
1.73077	4.5	0.384615	O.r
2.02404	3.72596	0.543226	O.r
2.01923	5.125	0.393996	O.r
1.66667	5.13449	0.324602	O.r
1.61864	4.0634	0.398345	O.r
1.58021	4.54371	0.34778	O.r
1.14313	4.2171	0.271071	O.r
1.62344	4.42843	0.366594	O.r
1.94524	3.70317	0.525292	O.r
1.89241	5.18252	0.365153	O.r
1.74664	4.08349	0.427732	O.r
1.43954	5.75336	0.250209	O.r
1.63628	5.3119	0.30804	O.r
2.12092	4.10269	0.516959	O.r
1.79463	4.21785	0.425484	O.r
1.49232	4.80326	0.310689	O.r
1.90499	3.95873	0.481212	O.r
1.94338	4.59213	0.423197	O.r
1.72026	4.41479	0.389658	O.r
1.90354	4.45016	0.427746	O.r
1.48553	5.27331	0.281707	O.r
1.56731	4.56731	0.343158	O.r
1.51282	4.38462	0.345029	O.r
2.13782	4.63141	0.461592	O.r
1.36218	4.60577	0.295755	O.r
1.46154	4.0609	0.359905	O.r
1.71474	4.63782	0.36973	O.r
1.68185	4.82244	0.348754	O.p
2.12648	5.278	0.402896	O.p
2.15375	4.69251	0.458975	O.p
1.88305	4.28252	0.439705	O.p
2.2029	5.52701	0.39857	O.p
1.44415	3.98423	0.362467	O.p
2.11038	4.4297	0.476416	O.p
2.12052	5.46254	0.388193	O.p
1.64036	5.05614	0.324429	O.p
2.87714	4.96176	0.579862	O.p
1.75102	5.27421	0.331996	O.p
1.57284	6.03955	0.260423	O.p
2.03263	5.07178	0.400772	O.p
1.7668	5.10145	0.346333	O.p
1.80488	4.80817	0.375377	O.p
3.33496	4.62755	0.720676	O.p
1.95265	5.05633	0.38618	O.p
1.3004	4.32543	0.30064	O.p
1.50824	3.53461	0.426706	O.p
2.54809	4.86034	0.524261	O.p
2.15921	4.53553	0.476066	O.p
1.57181	5.52701	0.284386	O.p
1.60844	4.49176	0.358086	O.p
1.75204	5.32463	0.329044	O.p
1.83553	4.9	0.374597	O.p
1.62763	5.13158	0.317179	O.p
1.78793	5.33442	0.335168	O.p
1.70684	5.1759	0.329767	O.p
1.15635	5.46091	0.211751	O.p
1.93642	6.158	0.314456	O.p
1.94122	4.85714	0.399664	O.p
1.28279	4.67897	0.274162	O.p
1.80261	4.95595	0.363726	O.p
1.30995	4.4845	0.292106	O.p
1.93816	4.91447	0.394378	O.p
1.27552	4.44995	0.286637	O.p
1.28288	4.50099	0.285022	O.p
2.93863	5.16727	0.568701	O.p
2.26715	5.04693	0.449213	O.p
1.47659	4.91717	0.300293	O.p
1.5976	4.60838	0.346674	O.p
1.28623	5.1497	0.249767	O.p
2.7491	5.47179	0.502413	O.p
1.52461	4.55462	0.334739	O.p
2.04082	4.51621	0.451887	O.p
1.94059	5.633	0.344504	O.p
2.40865	5.82933	0.413196	O.p
1.8774	5.85337	0.320739	O.p
1.7006	4.3521	0.390754	O.p
1.37772	3.68359	0.374016	O.p
1.98546	5.30866	0.374004	O.p
1.90751	5.30829	0.359347	O.p
1.75266	4.88889	0.358498	O.p
2.14653	5.42178	0.395909	O.p
1.51923	4.05385	0.374763	O.p
2.61583	5.88417	0.444554	O.p
1.51544	5.20463	0.291172	O.p
2.10145	3.80105	0.55286	O.p
1.98046	5.20847	0.380238	O.p
1.73684	4.47368	0.388235	O.p
1.90231	5.45875	0.348489	O.p
2.11923	5.61923	0.377139	O.p
1.375	4.58846	0.299665	O.p
1.61011	3.78339	0.425573	O.p
2.23345	5.31889	0.41991	O.p
1.85834	4.96279	0.374456	O.p
1.77911	5.21729	0.341003	O.p
1.74146	5.10244	0.3413	O.p
2.11218	4.84615	0.435847	O.p
1.59936	4.75	0.336707	O.p
1.63782	4.98718	0.328406	O.p
1.94801	4.63415	0.42036	O.p
2.06354	6.45379	0.319741	O.p
2.8119	5.65899	0.496891	O.p
2.1785	4.48177	0.486081	O.p
1.70489	4.31957	0.39469	O.p
1.72018	5.3555	0.321199	O.p
1.51875	4.61362	0.329187	O.p
1.48049	5.30604	0.279019	O.p
1.74441	4.96805	0.351125	O.p
2.02236	4.47284	0.452143	O.p
2.10224	5.23003	0.401955	O.p
1.78914	4.58147	0.390516	O.p
2.2524	5.02556	0.448188	O.p
2.8115	5.25879	0.534629	O.p
2.03775	4.24504	0.48003	O.p
2.4984	5.33589	0.468225	O.p
2.04734	6.26679	0.326697	O.p
2.27885	5.07372	0.449147	O.p
2.07692	4.82051	0.430851	O.p
2.14103	5.44872	0.392941	O.p
1.93022	5.41933	0.356172	O.p
2.34635	5.0096	0.468371	O.p
1.92725	5.29675	0.363855	O.p
1.76452	4.86599	0.362623	O.p
2.07638	5.75417	0.360848	O.p
2.52567	5.34981	0.472106	O.p
2.24392	5.33931	0.420264	O.p
1.77657	4.98079	0.356684	O.p
2.16216	4.05142	0.53368	O.p
2.84314	4.8317	0.588434	O.p
1.96177	5.19446	0.377665	O.p
2.18771	4.62657	0.472857	O.p
2.75592	5.22612	0.527335	O.p
2.29412	5.70098	0.402408	O.p
2.08157	4.99021	0.41713	O.p
2.23359	4.66216	0.479089	O.p
1.72394	4.3166	0.399374	O.p
2.08564	4.26219	0.489335	O.p
2.13307	5.11199	0.417268	O.p
2.99592	4.74612	0.631235	O.p
2.033	4.90297	0.414647	O.p
1.70957	4.98614	0.342865	O.p
2.16766	5.10363	0.424728	O.p
2.05049	4.25244	0.482191	O.p
1.9951	5.6634	0.352279	O.p
1.94595	4.04087	0.481566	O.p
1.90244	4.02241	0.47296	O.p
2.70495	5.10297	0.530074	O.p
2.22849	4.5727	0.487346	O.p
1.85761	4.86091	0.382154	C.ro
1.90359	4.13399	0.460474	C.ro
1.6873	4.08143	0.413408	C.ro
2.24816	4.65796	0.48265	C.ro
1.80408	4.7249	0.381824	C.ro
1.78484	3.67074	0.486234	C.ro
1.95102	3.94776	0.49421	C.ro
1.69306	4.2351	0.399769	C.ro
1.54739	3.95425	0.391322	C.ro
1.75578	4.28647	0.409609	C.ro
1.86074	4.85106	0.383573	C.ro
1.98286	4.70402	0.421525	C.ro
2.09462	5.10767	0.410093	C.ro
1.53491	4.35046	0.352816	C.ro
1.44809	4.39028	0.329841	C.ro
1.93144	4.34278	0.444748	C.ro
1.50244	3.90244	0.385	C.ro
1.49756	4.0374	0.370922	C.ro
2.0898	4.02612	0.519059	C.ro
1.49388	4.71184	0.317048	C.ro
1.88119	4.35644	0.431818	C.ro
1.48566	3.98417	0.37289	C.ro
1.54414	4.19895	0.367744	C.ro
1.95262	4.13572	0.472136	C.ro
2.05826	5.25288	0.391834	C.ro
2.66426	4.19495	0.635112	C.ro
2.16366	4.05535	0.533531	C.ro
2.16145	4.07711	0.530142	C.ro
2.19518	4.3253	0.507521	C.ro
1.87229	4.51566	0.414621	C.ro
2.44337	4.57108	0.534528	C.ro
2.43133	4.20482	0.578223	C.ro
2.02651	4.50361	0.449973	C.ro
1.98313	4.53253	0.437533	C.ro
1.72289	4.46988	0.385445	C.ro
2.26506	4.76627	0.475228	C.ro
2.03361	3.87515	0.524783	C.ro
2.28024	4.69795	0.485369	C.ro
2.24837	4.96078	0.453228	C.ro
1.98041	4.44082	0.445956	C.ro
1.8917	4.28881	0.441077	C.ro
1.94705	4.34416	0.448199	C.ro
2	4.49579	0.444861	C.ro
1.97829	4.5187	0.4378	C.ro
1.89867	4.07479	0.465956	C.ro
1.81687	4.7012	0.386468	C.ro
1.88661	4.02895	0.468263	C.ro
1.86972	3.92762	0.476044	C.ro
1.72256	3.82871	0.449905	C.ro
2.01203	4.48375	0.448739	C.ro
2.04332	4.5006	0.454011	C.ro
1.82431	3.96631	0.459951	C.ro
2.24786	5.08635	0.441939	C.ro
2.27102	4.83102	0.470091	C.ro
2.13224	4.64327	0.459212	C.ro
2.18577	4.4608	0.489995	C.ro
2.41496	4.01206	0.601924	C.ro
1.67189	4.60555	0.363017	C.ro
2.22204	4.25633	0.522056	C.ro
2.28735	4.04735	0.565147	C.ro
1.97112	3.74489	0.52635	C.ro
1.9639	4.20217	0.467354	C.ro
2.43081	4.60409	0.527967	C.ro
2.54186	5.19578	0.489216	C.ro
2.70425	4.67157	0.578874	C.ro
2.15536	4.51349	0.477536	C.ro
2.16054	4.63443	0.466194	C.ro
2.35203	4.2089	0.558824	C.ro
2.16085	4.60659	0.469079	C.ro
1.90097	4.04589	0.469851	C.ro
2.06755	4.83233	0.427858	C.ro
2.27503	4.56695	0.498151	C.ro
2.58122	4.99102	0.517174	C.ro
2.92735	4.35429	0.672291	C.ro
1.9639	4.52948	0.433581	C.ro
2.15403	4.59687	0.468586	C.ro
2.30231	4.80924	0.478726	C.ro
3.08124	4.83946	0.636691	C.ro
2.00774	5.05609	0.397093	C.ro
1.91191	4.2447	0.450423	C.ro
2.34524	4.55556	0.514808	C.ro
2.09888	4.76994	0.440022	C.ro
2.40065	4.80458	0.49966	C.ro
2.04252	4.63614	0.440564	C.ro
2.60155	5.50677	0.472427	C.ro
2.04449	4.65377	0.439318	C.ro
1.94448	4.40714	0.441212	C.ro
2.10602	4.26988	0.493228	C.ro
2.53253	4.62892	0.547111	C.ro
2.83855	4.67952	0.606591	C.ro
2.61224	4.35429	0.599925	C.ro
2.13562	4.74346	0.450224	C.ro
1.92653	4.17469	0.461478	C.ro
2.33253	4.43855	0.525516	C.ro
2.0988	3.97349	0.528199	C.ro
1.8747	4.20482	0.445845	C.ro
2.07952	4.75181	0.437627	C.ro
2.13405	4.6225	0.461667	C.ro
2.4114	4.33744	0.55595	C.ro
1.99538	4.59938	0.433836	C.ro
2.60401	4.6225	0.563333	C.ro
2.24191	4.51464	0.496587	C.ro
1.80583	4.36893	0.413333	C.ro
2.5534	4.6699	0.546778	C.ro
2.23301	4.25243	0.525114	C.ro
2.75728	4.99029	0.552529	C.ro
2.28155	4.47573	0.509761	C.ro
2.1165	4.01942	0.52657	C.ro
1.93204	4.84466	0.398798	C.ro
1.96117	4.66019	0.420833	C.ro
2.03883	5.34951	0.381125	C.ro
2.33974	4.57692	0.511204	C.ro
2.04487	4.80449	0.425617	C.ro
2.0641	5.14423	0.401246	C.ro
2.0609	4.88462	0.421916	C.ro
1.78205	4.88782	0.36459	C.ro
2.70192	5.16987	0.522629	C.ro
3.30231	5.2439	0.629743	C.ro
2.638	4.81707	0.547635	C.ro
2.38126	4.87805	0.488158	C.ro
2.68614	5.4172	0.495853	C.ro
3.03205	4.66346	0.650172	C.ro
2.15385	4.46795	0.482066	C.ro
2.10256	4.50962	0.46624	C.ro
2.58013	4.99038	0.51702	C.ro
2.54167	4.44231	0.57215	C.ro
2.13738	4.63929	0.460711	C.ro
1.93016	4.48964	0.429915	C.ro
2.05295	4.27859	0.479821	C.ro
2.22947	4.03684	0.552281	C.ro
2.15656	5.00767	0.430651	C.ro
1.76735	4.92928	0.358541	C.ro
1.59673	4.61551	0.34595	C.ro
1.79755	4.3249	0.415629	C.ro
2.8264	4.89769	0.577089	C.ro
1.92607	4.79736	0.401486	C.ro
2.0846	4.63979	0.449288	C.ro
1.77396	4.9967	0.355026	C.ro
2.05783	4.61205	0.446186	C.ro
1.91566	4.28916	0.446629	C.ro
1.72409	4.48185	0.384683	C.ro
2.31325	4.83373	0.478564	C.ro
2.29639	4.68434	0.490226	C.ro
1.93531	4.61782	0.419097	C.ro
1.76074	4.87773	0.360976	C.ro
2.52593	4.82268	0.523762	C.ro
3.01471	5.03922	0.598249	C.ro
2.08007	4.68791	0.443709	C.ro
1.96729	4.41047	0.446051	C.ro
2.66023	5.23938	0.507738	C.ro
2.01635	4.32216	0.466515	C.ro
1.68936	4.64243	0.363895	C.ro
1.68163	4.64653	0.361911	C.ro
1.81818	4.33075	0.41983	C.ro
1.96905	4.45068	0.442416	C.ro
2.07357	4.61762	0.449057	C.ro
2.02904	4.95837	0.409215	C.ro
1.9298	4.53224	0.425793	C.ro
1.86385	4.92796	0.378219	C.ro
1.99868	4.25248	0.470003	C.ro
2.24603	4.97751	0.451236	C.ro
2.21825	4.43783	0.499851	C.ro
2.09321	4.39575	0.47619	C.ro
1.79395	4.88635	0.367135	C.ro
1.86601	4.77941	0.390427	C.ro
1.92163	4.99429	0.384766	C.ro
2.56936	4.64656	0.55296	C.ro
1.89385	3.79976	0.498413	C.ro
1.69916	4.76534	0.356566	C.ro
1.78554	4.98554	0.358144	C.ro
1.66506	4.67711	0.356002	C.ro
1.95106	4.8907	0.398933	C.ro
1.90843	4.56627	0.417942	C.ro
1.67172	4.11338	0.40641	C.ro
2.31064	4.70192	0.491425	C.ro
1.95506	5.05354	0.386869	C.ro
1.79142	4.74983	0.377154	C.ro
1.94778	4.74855	0.410183	C.ro
2.55899	4.82785	0.530048	C.ro
1.96735	4.67755	0.420593	C.ro
1.82041	4.49469	0.405013	C.ro
1.6781	4.95915	0.338386	C.ro
1.92077	5.53043	0.34731	C.ro
2.04638	4.72464	0.433129	C.ro
1.89835	5.42442	0.349963	C.ro
2.30417	5.02698	0.45836	C.ro
1.85314	4.86184	0.381161	C.ro
1.78462	4.66346	0.38268	C.ro
1.80488	5.44891	0.331236	C.ro
2.34804	5.09477	0.460872	C.ro
1.74488	4.20886	0.414573	C.ro
1.68484	4.29039	0.3927	C.ro
1.57426	4.84851	0.324689	C.ro
1.89897	4.86188	0.390584	C.ro
2.1447	4.69871	0.456444	C.ro
1.94229	4.51621	0.430072	C.ro
1.89153	4.60728	0.410552	C.ro
1.62834	4.7671	0.34158	C.ro
1.87905	4.7004	0.399765	C.ro
2.06996	4.79461	0.431727	C.ro
2.71502	4.77214	0.568931	C.ro
1.95649	4.02769	0.485761	C.ro
1.96898	4.36082	0.451516	C.ro
2.86204	4.21388	0.679194	C.ro
2.56863	4.84641	0.530007	C.ro
2.033	3.94059	0.515913	C.ro
2.26455	4.50661	0.502495	C.ro
2.44092	4.84224	0.504089	C.ro
1.87592	4.44735	0.421806	C.ro
1.94956	4.65373	0.418925	C.ro
2.14117	4.20741	0.508903	C.ro
2.03267	4.49307	0.452402	C.ro
2.11576	4.45016	0.475434	C.ro
2	4.1672	0.479938	C.ro
1.8328	4.18006	0.438462	C.ro
2.32154	4.50804	0.514979	C.ro
1.60772	4.36656	0.368189	C.ro
1.89068	4.7074	0.401639	C.ro
1.91672	4.68473	0.409142	C.ro
1.9055	4.64802	0.409959	C.ro
2.59595	5.05689	0.513349	C.ro
2.28571	4.76834	0.479352	C.ro
1.88224	5.03282	0.373993	C.ro
1.79497	4.98839	0.359829	C.ro
2.37277	4.76272	0.498196	C.ro
2.23265	4.53668	0.492133	C.ro
2.0264	4.76172	0.425561	C.ro
2.1063	5.17416	0.40708	C.ro
1.92816	4.88653	0.394587	C.ro
2.00923	4.66974	0.430265	C.ro
1.91815	5.32673	0.360099	C.ro
1.79433	4.19644	0.427584	C.ro
1.76153	4.94335	0.356343	C.ro
1.79247	4.24851	0.421904	C.ro
1.85856	4.77991	0.388827	C.ro
2.06609	5.27826	0.391435	C.ro
1.95517	5.0178	0.389648	C.ro
1.87698	5.15344	0.36422	C.ro
1.94455	5.09307	0.381804	C.ro
2.01584	4.96634	0.405901	C.ro
2.16821	5.07815	0.426969	C.ro
1.96075	5.22159	0.375509	C.ro
2.15184	4.77388	0.450752	C.ro
1.967	5.49043	0.358259	C.ro
1.83125	4.50099	0.406854	C.ro
2.20225	5.27429	0.417544	C.ro
1.81229	4.70853	0.384896	C.ro
2.09492	4.98879	0.419926	C.ro
2.37888	5.32805	0.446482	C.ro
1.95902	5.65367	0.346505	C.ro
2.12558	5.20423	0.408433	C.ro
1.86517	4.81163	0.387637	C.ro
1.90747	4.9729	0.383573	C.ro
1.7703	4.33267	0.408592	C.ro
2.03431	5.33987	0.380967	C.ro
2.35426	5.37607	0.437915	C.ro
1.97487	4.61905	0.427549	C.ro
2.12161	4.73629	0.447949	C.ro
1.92977	4.89318	0.39438	C.ro
1.75223	4.61943	0.379318	C.ro
1.85262	5.03462	0.367976	C.ro
1.98519	4.86081	0.408408	C.ro
1.97624	4.91188	0.402338	C.ro
1.74653	5.01584	0.348204	C.ro
2.00298	5.37972	0.372321	C.ro
2.0109	4.9891	0.403059	C.ro
1.92475	5.00891	0.384266	C.ro
2.03667	5.26363	0.386933	C.ro
1.84226	5.02083	0.366924	C.ro
2.18038	5.26759	0.413923	C.ro
1.9502	4.78498	0.407566	C.ro
1.94466	5.19526	0.374315	C.ro
1.72885	5.14862	0.33579	C.ro
2.14105	4.92235	0.434965	C.ro
1.77923	4.56255	0.389964	C.ro
1.67268	4.72443	0.35405	C.ro
1.59326	4.5006	0.354011	C.ro
1.72894	4.62924	0.373484	C.ro
1.86538	4.62885	0.402991	C.ro
2.31915	4.53191	0.511737	C.ro
1.78122	5.12682	0.347432	C.ro
1.70765	4.58083	0.372781	C.ro
1.82516	5.34967	0.341173	C.ro
1.50847	4.43584	0.340066	C.ro
1.83051	4.65375	0.39334	C.ro
1.9401	4.84444	0.400479	C.ro
1.82575	4.45886	0.409466	C.ro
2.21165	5.07184	0.436064	C.ro
1.69632	4.66151	0.3639	C.ro
1.86122	4.66939	0.398601	C.ro
2.08306	4.66842	0.446202	C.ro
1.61932	4.71111	0.343724	C.ro
1.76812	5.07826	0.348174	C.ro
1.84541	4.83092	0.382	C.ro
1.75266	4.63961	0.377759	C.ro
1.88019	4.58357	0.410202	C.ro
1.63707	4.61776	0.354515	C.ro
1.6849	4.42776	0.380531	C.ro
1.80193	4.68357	0.384734	C.ro
1.93961	4.34783	0.446111	C.ro
1.70986	4.75469	0.359616	C.ro
1.72779	4.86227	0.355347	C.ro
1.83234	4.85281	0.377584	C.ro
1.8946	4.29249	0.441375	C.ro
1.6497	4.423	0.372983	C.ro
1.72973	4.70929	0.367301	C.ro
1.9709	4.37169	0.450832	C.ro
2.15608	4.41931	0.487878	C.ro
1.85185	4.34392	0.426309	C.ro
1.84311	4.58405	0.402071	C.ro
2.12409	4.47129	0.475052	C.ro
1.67261	4.8198	0.347028	C.ro
1.95899	4.89286	0.400378	C.ro
1.69941	4.93738	0.344192	C.ro
1.53065	4.28214	0.357451	C.ro
1.66865	4.64818	0.358989	C.ro
1.62388	4.7637	0.340886	C.ro
1.71881	4.70891	0.365013	C.ro
2.94785	5.11947	0.575812	C.ro
1.66733	4.27855	0.389695	C.ro
1.75968	4.47666	0.393079	C.ro
1.54509	4.52032	0.341811	C.ro
